# Supplementary material for: Simultaneous determination of phenolic metabolites in Chinese citrus and grape cultivars
Source: PeerJ. 2020 Jun 3;8:e9083. doi: 10.7717/peerj.9083 (PMC7275686; doi:10.7717/peerj.9083)
Supplement: Supplemental Information 1 [file peerj-08-9083-s001.xls]

## Sheet: Sheet1
	No		Narigin	Hesperidin	Rutin	Quercetin	Nobiletin	Tangeretin	Catechin	Epicatechin	Gallic acid	Chlorogenic acid	Caffeic acid	Syringic acid	ρ-Coumaric acid	Ferulic acid	Benzoic acid	Salicylic acid	Resveratrol
1	DWWD		8250.15	366.91	114.06	137.1	1.03	1.29	0	0	0	22.22	7.49	0.89	0	7.08	53.49	6.35	6.35
1	DWWD		7838.04	375.03	101.46	138.82	1.35	1.21	0	0	0	22.15	8.43	0.74	0	5.68	52.5	6.17	6.17
1	DWWD		8095.87	367.09	106.72	157.29	1.03	1.12	0	0	0	24.12	9.41	1.05	0	5.88	56.93	6.31	6.31
2	HMMY		8255.17	12.22	98.81	150.71	1.82	17.23	22.22	9.03	0	9.02	10.05	1.15	15.65	1.67	83.31	22.61	22.61
2	HMMY		8129.54	12.05	104.59	151.88	1.68	17.13	23.38	9.61	0	10.77	9.92	1.25	17.43	1.55	83.06	22.22	22.22
2	HMMY		8226.43	14.51	100.94	144.16	1.75	19.52	22.37	9.23	0	8.08	9.56	1.19	16.94	1.6	80.7	21.17	21.17
3	HRMY		8141.27	33.53	14.34	75.8	6.76	54.78	16.26	0	0.86	18.99	11.73	5.51	10.11	4.55	17.17	16.8	16.8
3	HRMY		8190.12	33.98	11.32	72.1	6.65	58.23	16.6	0	0.84	20.89	11.11	4.59	10.21	4.58	15.65	14.84	14.84
3	HRMY		8008.62	31.28	14.59	72.34	6.88	52.8	16.96	0	0.84	20.53	10.96	4.52	10.43	4.36	16.67	15.28	15.28
4	GXMY		6073.68	305.33	81.46	40.09	2.7	0.85	55.44	0	1.33	3.57	8.25	0.9	0.29	1.06	5.92	5.31	5.31
4	GXMY		5759.36	307.6	77.63	48.35	2.64	0.71	57.59	0	1.22	3.51	7.1	1.05	0.3	1.08	5.96	5.19	5.19
4	GXMY		5998.02	314.62	80.52	53.39	2.71	0.8	50.12	0	1.49	3.52	9.16	0.87	0.26	1.28	5.69	5.62	5.62
5	HJY		6498.55	183.75	81.29	85.11	0.63	1.5	97.97	0.36	1.43	1.51	5.17	2.8	0.38	0.85	4.16	12.71	12.71
5	HJY		6334.9	201.85	79.57	81.27	0.75	1.4	98.24	0.37	1.57	1.11	5.16	2.94	0.39	0.82	4.31	10.68	10.68
5	HJY		6273.95	175.43	77.16	82.32	0.75	1.55	97.59	0.34	1.43	1.43	5.05	2.92	0.36	0.89	3.97	10.91	10.91
6	HY		7874.95	558.27	36.67	17.14	57.52	43.78	8.76	0	0	19.77	2.56	10.54	0	2.87	4.75	12.36	12.36
6	HY		7484.13	523.69	32.15	16.2	54.34	41.73	7.53	0	0	19.02	2.46	9.04	0	2.09	4.31	14.12	14.12
6	HY		7595.1	553.76	34.68	16.18	54	42.43	6.54	0	0	18.76	2.41	9.91	0	2.85	3.62	10.15	10.15
7	PTY		3579.9	382.22	1805.22	28.64	75.66	78.5	106.33	0	0	43.95	18.14	4.75	0.8	2.24	21.29	232.84	232.84
7	PTY		3734.4	398.83	1857.07	23.07	80.44	70.14	96.24	0	0	43.01	20.72	4.71	0.85	2.26	20.91	216.64	216.64
7	PTY		3511.97	374.65	1741.86	25.26	74.86	75.35	99.81	0	0	41.96	17.69	5.01	0.72	1.94	22.43	217.65	217.65
8	PSY		96.1	16520.1	39.8	1249.54	1391.2	1313.64	23.47	0	0	26.58	2.05	0	35.18	28.77	3.1	764.2	764.2
8	PSY		96.88	15813.6	36.96	201.14	186.31	181.87	21.98	0	0	24.83	2.4	0	34.35	30.29	3.15	740.51	740.51
8	PSY		100.63	15588.1	38.33	45.35	44.48	44.5	23.06	0	0	25.49	2.79	0	34.88	27.91	3.02	748.35	748.35
9	GG		32.87	9771.96	79.57	722.32	885.56	774.88	23.61	21.32	8.71	1.76	13.27	15.82	0.59	3.22	13.95	11.11	11.11
9	GG		37.42	9962.8	77.44	733	924.6	775.89	22.18	21.69	8.75	2.08	13.67	15.97	0.5	3.55	13.07	14.71	14.71
9	GG		35.65	9512.75	74.79	753.5	888.06	758.52	20.28	22.82	9.31	1.34	12.85	16.61	0.54	2.75	13.38	12.48	12.48
10	NFMJ		48.87	26744.6	129.93	370.51	2645.21	2284.6	0	0	0	52.6	0	0	0	3.05	6.06	169.04	169.04
10	NFMJ		49.91	26449.9	133.02	365.81	2609.53	2259.66	0	0	0	51.1	0	0	0	3.02	4.28	169.36	169.36
10	NFMJ		49.22	25288.4	135.61	348.86	2730.24	2185.21	0	0	0	52.99	0	0	0	2.66	5.63	172.11	172.11
11	WZMY		44.42	19978.7	83.24	1289.36	76.95	42.31	72.85	21.71	0	10.05	0	0	0.71	5.27	5.04	198.17	198.17
11	WZMY		56.2	20684.6	77.42	1326.57	80.56	41.03	65.58	20.42	0	9.48	0	0	0.8	5.27	5.22	209.41	209.41
11	WZMY		44.53	19702.4	76.67	1286.64	72.41	40.15	69.89	20.36	0	9.36	0	0	0.78	5.43	5.39	199.11	199.11
12	MGJC		19.37	263.03	16.75	1826.71	891.1	298.63	104.45	5.64	0	8.86	13.98	14.61	1.33	0.68	11.87	355.8	355.8
12	MGJC		19.57	271	17.71	1810.42	876.06	314.13	106.01	5.06	0	9.96	14.93	14.32	1.28	0.75	11.1	352.17	352.17
12	MGJC		20.19	284.53	16.67	1810.98	900.95	315.64	104.6	4.77	0	9.8	12.97	15.29	1.27	0.71	12	372.08	372.08
13	NHEQC		15689.9	1301.95	29.53	482.02	2.1	0	32.6	0	0	22.52	7.85	0	44.59	2.04	163.79	46.97	46.97
13	NHEQC		16226.4	1324.38	26.17	490.49	2.21	0	32.29	0	0	22.79	8.49	0	44.11	2.23	160.64	45.11	45.11
13	NHEQC		16504.9	1463.92	23.27	489.27	2.35	0	34.74	0	0	23.02	8.47	0	43.12	2.27	165.69	43.23	43.23
14	YLK		249.89	8035.67	31.83	3.91	0	33.69	150.01	0	0	0.46	2.25	31.41	0.27	29.52	12.26	65.51	65.51
14	YLK		258.43	8027.64	30.5	4.37	0	36.89	147.79	0	0	0.39	1.92	31.07	0.26	30.89	12.5	66.44	66.44
14	YLK		252.26	7915.4	30.88	3.92	0	35.73	158.75	0	0	0.42	2.29	31.06	0.26	31.29	12.18	64.74	64.74
15	FJ		28.34	8239.66	10.03	173.62	711.41	505.33	54.11	3.61	50.65	14.56	10.16	15.51	0.41	30.45	8.7	19.17	19.17
15	FJ		28.49	\	9.51	182.75	692.69	492.1	54.78	3.88	48.45	15.65	9.31	16.12	0.39	31.7	9.25	18.7	18.7
15	FJ		27.63	8470.86	10.14	177.98	707.16	517.29	50.44	3.57	51.38	14.16	9.88	14.41	0.39	32.53	9.48	19.51	19.51
	编号		Narigin	Hesperidin	Rutin	Quercetin	Nobiletin	Tangeretin	Catechin	Epicatechin	Gallic acid	Chlorogenic acid	Caffeic acid	Syringic acid	ρ-Coumaric acid	Ferulic acid	Benzoic acid	Salicylic acid	Resveratrol
1	XH No.1		1.35	145.45	97.58	261.88	24.13	5.65	55.23	48.44	2.46	33.94	0	0.76	0	19.14	21.17	139.23	139.23
1	XH No.1		1.55	165.44	95.77	268.59	28.79	5.26	60.36	55.93	2.22	34	0	0.67	0	17.74	21.29	138.84	138.84
1	XH No.1		1.55	167.91	88.02	279.52	24.34	4.84	56.4	51.99	2.41	32.81	0	0.65	0	18.98	19.86	149.12	149.12
2	XH No.2		1.67	245.25	199.98	329.54	0.29	11.53	39.19	101.38	8.25	44.45	3.56	1.65	0.71	1.85	5.58	15.29	15.29
2	XH No.2		1.64	241.44	199.63	344.91	0.32	10.54	41.47	101.28	7.7	43.74	3.4	1.51	0.63	1.74	4.5	17.45	17.45
2	XH No.2		1.57	236.37	206.24	343.84	0.3	11.38	41.08	93	7.71	43.12	3.42	1.64	0.66	1.77	4.77	17.44	17.44
3	XH No.3		25.39	350.04	52.28	329.92	0.35	3.39	96.36	107.34	3.3	36.2	3.72	2.98	8.98	1.58	22.64	10.77	10.77
3	XH No.3		27.06	355.19	52.9	302.84	0.36	3.54	98.9	102.72	3.36	35.87	3.9	2.69	8.81	1.52	21.57	11.55	11.55
3	XH No.3		26.67	350.54	48.9	329.54	0.38	3.29	97.06	97.58	3.89	35.14	3.83	3	8.38	1.65	23.37	11.67	11.67
4	BAK		48.06	28.15	913.75	0	2.42	102	234.58	52.18	8.33	39.65	6.85	0	2.15	3.85	3.81	39.53	39.53
4	BAK		53.03	31.19	882.54	0	2.35	97.94	241.42	53.08	7.97	42.6	6.96	0	2.18	3.29	3.23	40.14	40.14
4	BAK		49.5	31.79	934.07	0	2.57	103.46	253.24	56.24	8.01	43.04	6.95	0	2.24	3.98	3.66	39.53	39.53
5	DX		8.9	195.27	16.63	27.12	6.21	102.92	31.6	0	0	234.19	6.83	6.73	0	3.99	12.82	446.63	446.63
5	DX		9.12	220.19	17.04	28.36	7.9	103.51	32.96	0	0	232.66	6.71	6.43	0	3.89	13.24	453.27	453.27
5	DX		8.9	214.37	17.52	31.06	6.61	93.96	29.37	0	0	226.99	6.15	6.89	0	3.85	13.14	439.11	439.11
6	MM		13.83	103.85	328.29	0	55.22	26.07	130.69	205.38	2.92	24.45	4.39	0	5.73	5.28	64.27	896.84	896.84
6	MM		13.91	109.38	329.2	0	62.2	24.54	133.9	199.7	2.74	25.16	4.28	0	5.78	5.2	62.6	886.18	886.18
6	MM		11.23	98.23	322.71	0	63.14	26.56	131.44	213.53	3.27	25.72	2.24	0	5.53	5.17	64.38	894.37	894.37
7	HR		112.5	0	4.86	76.76	42.45	3.14	1.9	35.76	0	33.89	0	0	0	0	35.76	0	0
7	HR		103.39	0	4.19	71.77	48.81	2.85	2.27	38.27	0	29.09	0	0	0	0	38.27	0	0
7	HR		103.39	0	4.19	75.17	47.4	3.24	2.27	36.96	0	27.52	0	0	0	0	38.27	0	0
8	HM		7.99	35.39	94.76	6.6	38.93	0	318.62	110.51	2.09	33.53	2.74	1.95	0	1.22	0	68.03	68.03
8	HM		8.02	30.52	94.78	6.96	36.99	0	328.04	116.79	2.38	36.42	2.97	2.35	0	1.28	0	70.73	70.73
8	HM		9.08	35.62	98.26	7.14	37.27	0	322.01	125.46	2.04	36.16	3.06	2.04	0	1.23	0	70.22	70.22
9	QT		3.37	11.04	163.68	0	15.89	24.25	34.53	30.23	2.46	27.1	2.95	0	0	0.9	2.42	15.67	15.67
9	QT		4.32	10.98	162.06	0	16.14	25.63	33.09	30.5	2.46	26.06	2.9	0	0	0.83	2.59	16.06	16.06
9	QT		3.44	9.06	161.66	0	15.23	28.9	36.33	28.7	2.58	27.59	2.84	0	0	0.82	3.08	17.8	17.8
10	YS		3.99	12.59	112.25	0	0	9.88	93.15	38.18	0	34.76	0	0.81	3.28	0	3.42	96.86	96.86
10	YS		3.03	12.91	99.05	0	0	11.19	84.82	35.57	0	28.93	0	0.69	3.35	0	3.54	104.45	104.45
10	YS		3.69	14.02	104.02	0	0	11.47	83.93	35.02	0	33.79	0	0.77	3.33	0	3.57	107.12	107.12
11	JF		25.39	350.04	52.28	329.92	0.35	3.39	96.36	107.34	3.3	36.2	3.72	2.98	8.98	1.58	22.64	10.77	10.77
11	JF		27.06	355.19	52.9	302.84	0.36	3.54	98.9	102.72	3.36	35.87	3.9	2.69	8.81	1.52	21.57	11.55	11.55
11	JF		26.67	350.54	48.9	329.54	0.38	3.29	97.06	97.58	3.89	35.14	3.83	3	8.38	1.65	23.37	11.67	11.67
12	JMG		2.54933	601.196	35.0933	196.009	0.49987	3.6817	55.0951	161.091	0.891551	12.8001	0.403251	6.18673	2.29252	7.45106	58.3925	1460.55	5.12623
12	JMG		2.61438	611.727	31.06	197.091	0.508208	3.26531	59.49	150.072	1.16955	13.5134	0.42015	6.07209	2.35003	7.15151	51.3178	1449.87	5.11029
12	JMG		2.42528	603.52	32.8974	191.297	0.521203	3.27255	55.7894	148.199	1.09155	14.0797	0.391654	6.173	2.27091	7.68558	54.0464	1474.94	4.80752
